# Supplementary material
Source: PubMed Central journal article supplement (PMC2855313)
Supplement: NIHMS189901-supplement-1_si_001.pdf [file NIHMS189901-supplement-1_si_001.pdf]

**Temperature Dependence of Henry's Law Constant for Hydrogen Cyanide.  
Generation of Trace Standard Gaseous Hydrogen Cyanide.**

Jian Ma and Purnendu K. Dasgupta\*

*Department of Chemistry and Biochemistry*

*University of Texas, 700 Planetarium Place, Arlington, TX 76019-0065.*

*Phone: 817-272-3171, Fax: 817-272-3808, Email: [Dasgupta@uta.edu](mailto:Dasgupta@uta.edu)*

William Blackledge and Gerry R. Boss

Department of Medicine, University of California, San Diego, La Jolla, CA 92093-0652

# Supporting Information

**Environmental Science & Technology**

**Date:** March 8, 2010

**Number of pages:** 6

**Number of figures:** 4

**Number of tables:** 1

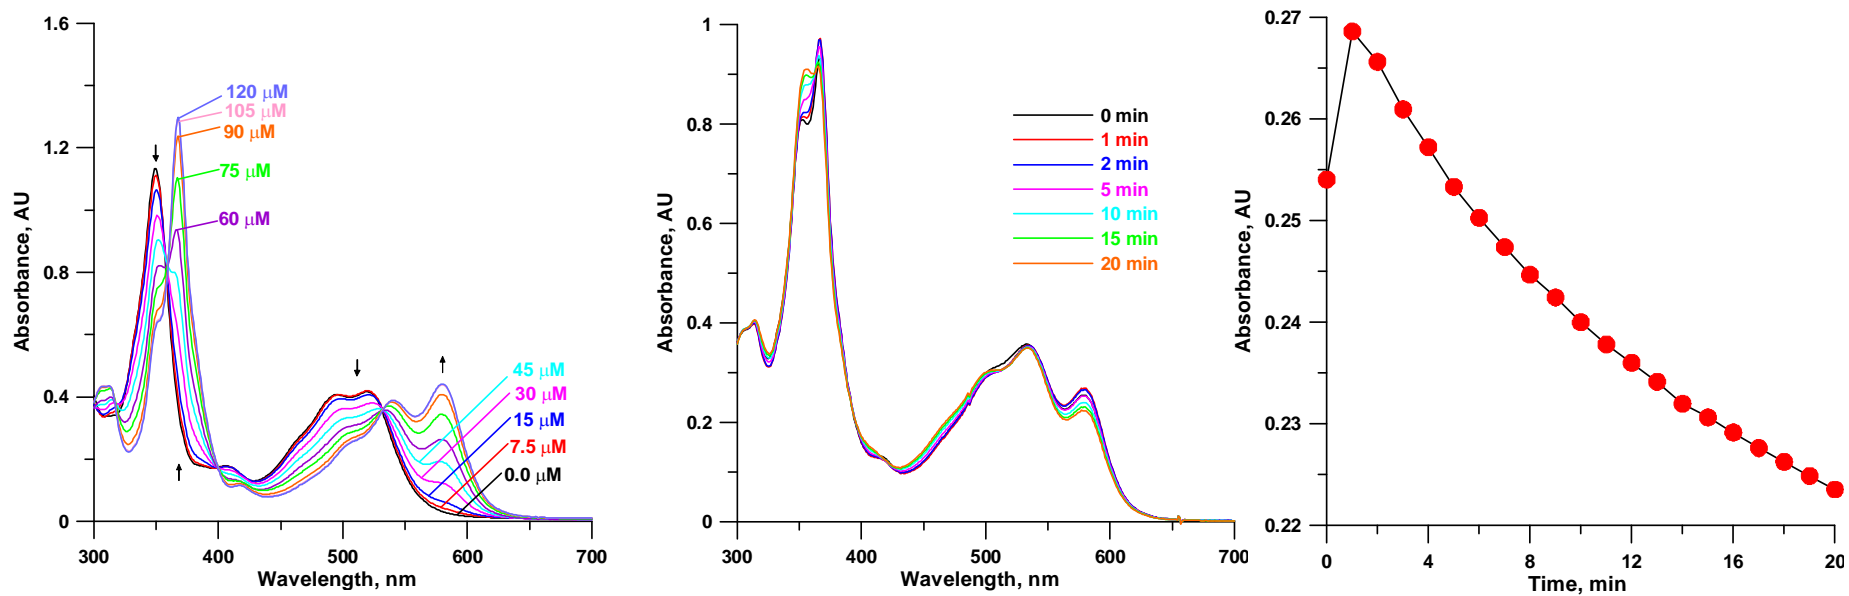

**Figure S1.** 50 μM Cobinamide in water reacting with cyanide. Left: Spectral change upon reaction with 0-120 μM cyanide; spectra taken 60 s after the reaction was initiated. Middle: Spectral change at different times after the reaction was initiated with 60 μM cyanide. Right: Same as in middle,  $A_{580\text{nm}}$  as a function of time.

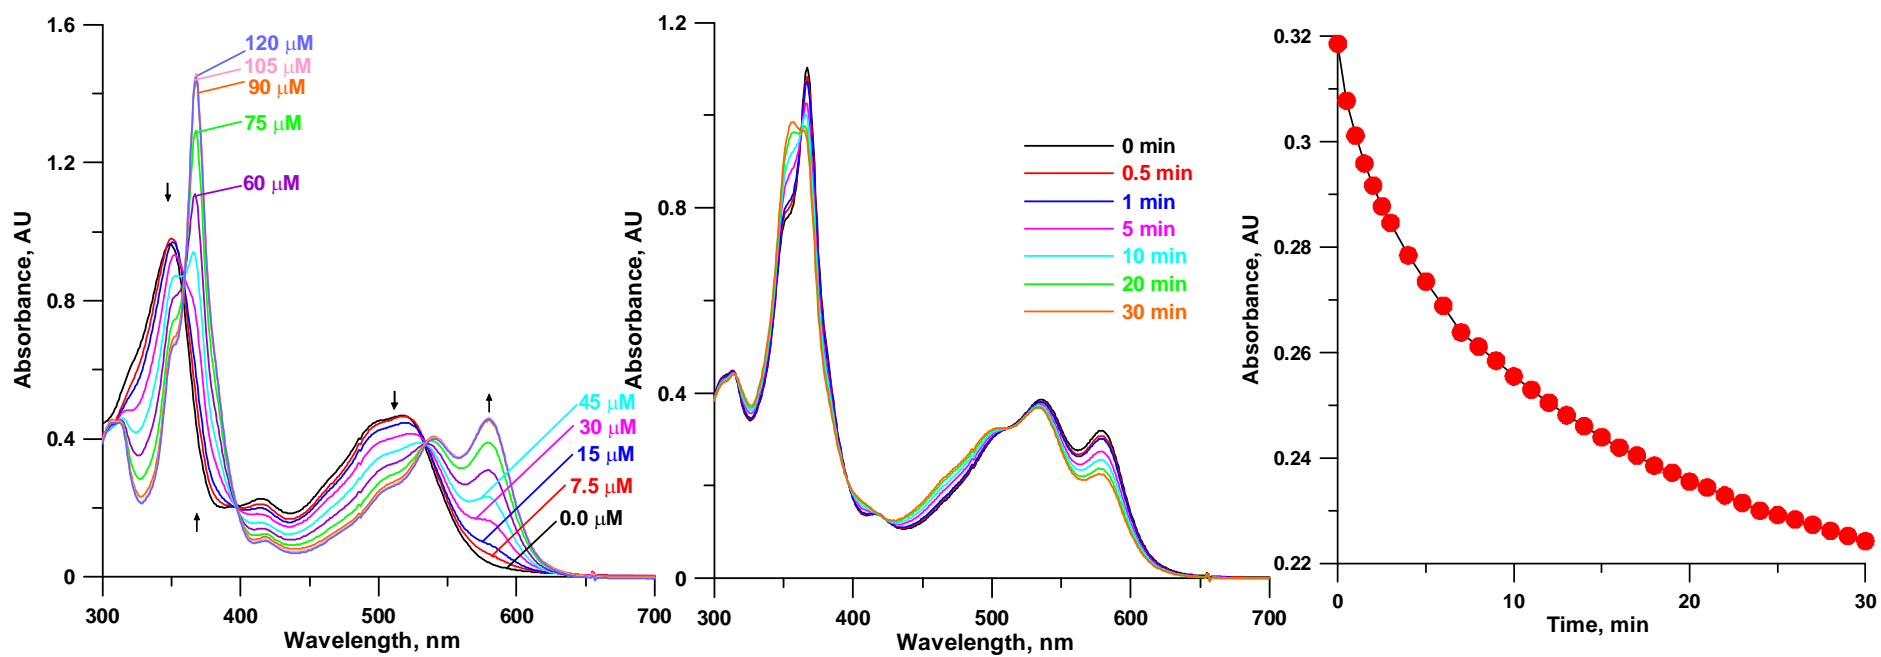

**Figure S2.** Identical to Figure S1, except reaction medium 0.1 M Na-phosphate buffer solution (pH 9.00).

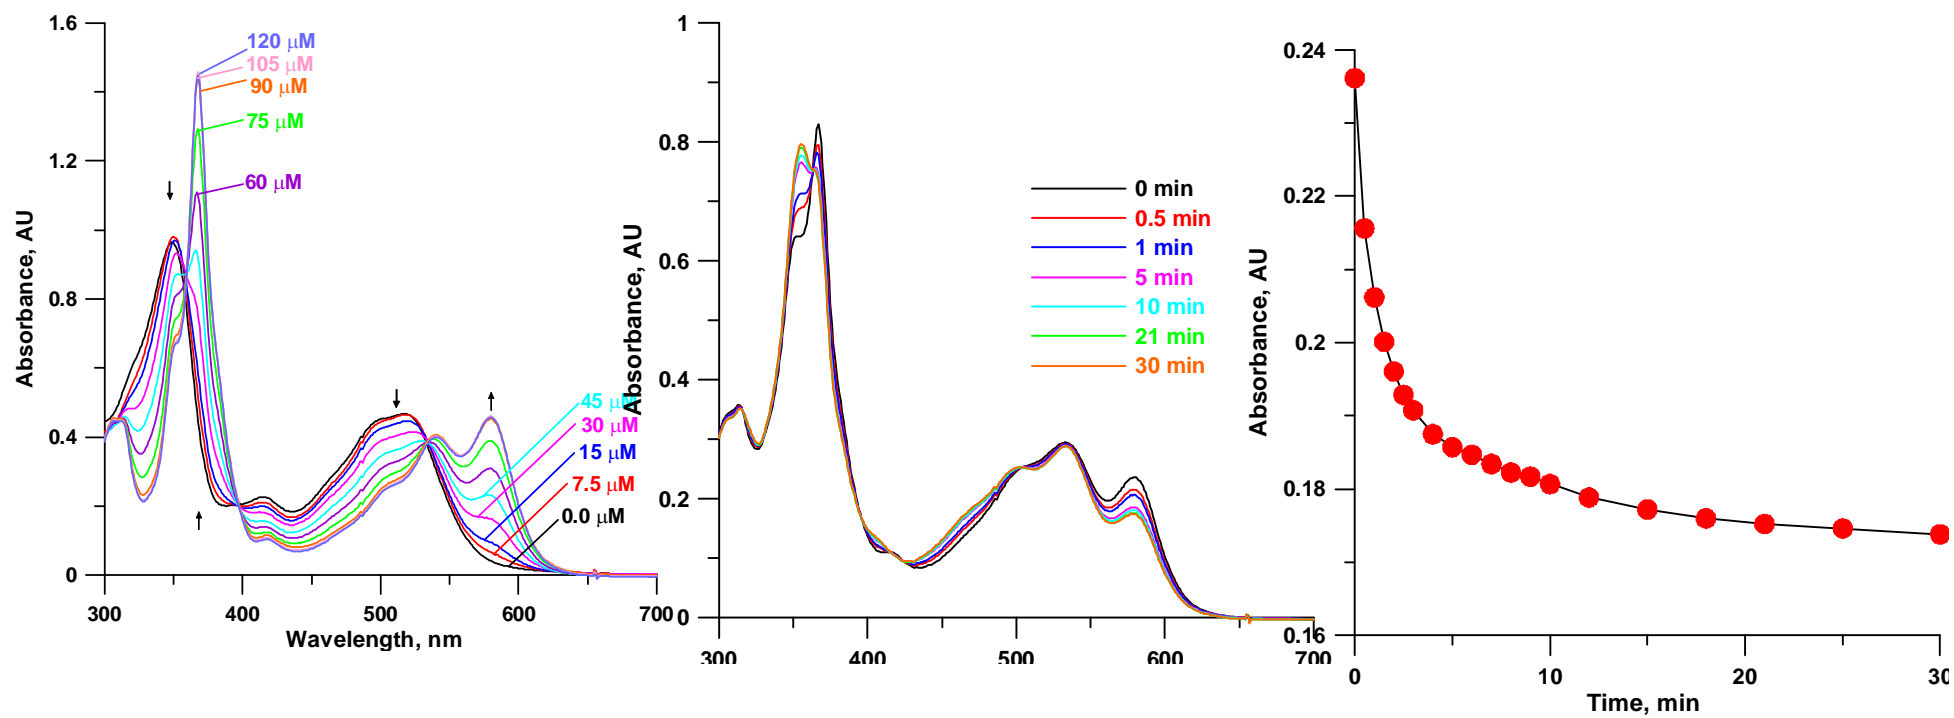

Figure S3. Identical to Figure S1, except reaction medium 0.1 M Na-borate buffer solution (pH 9.00).

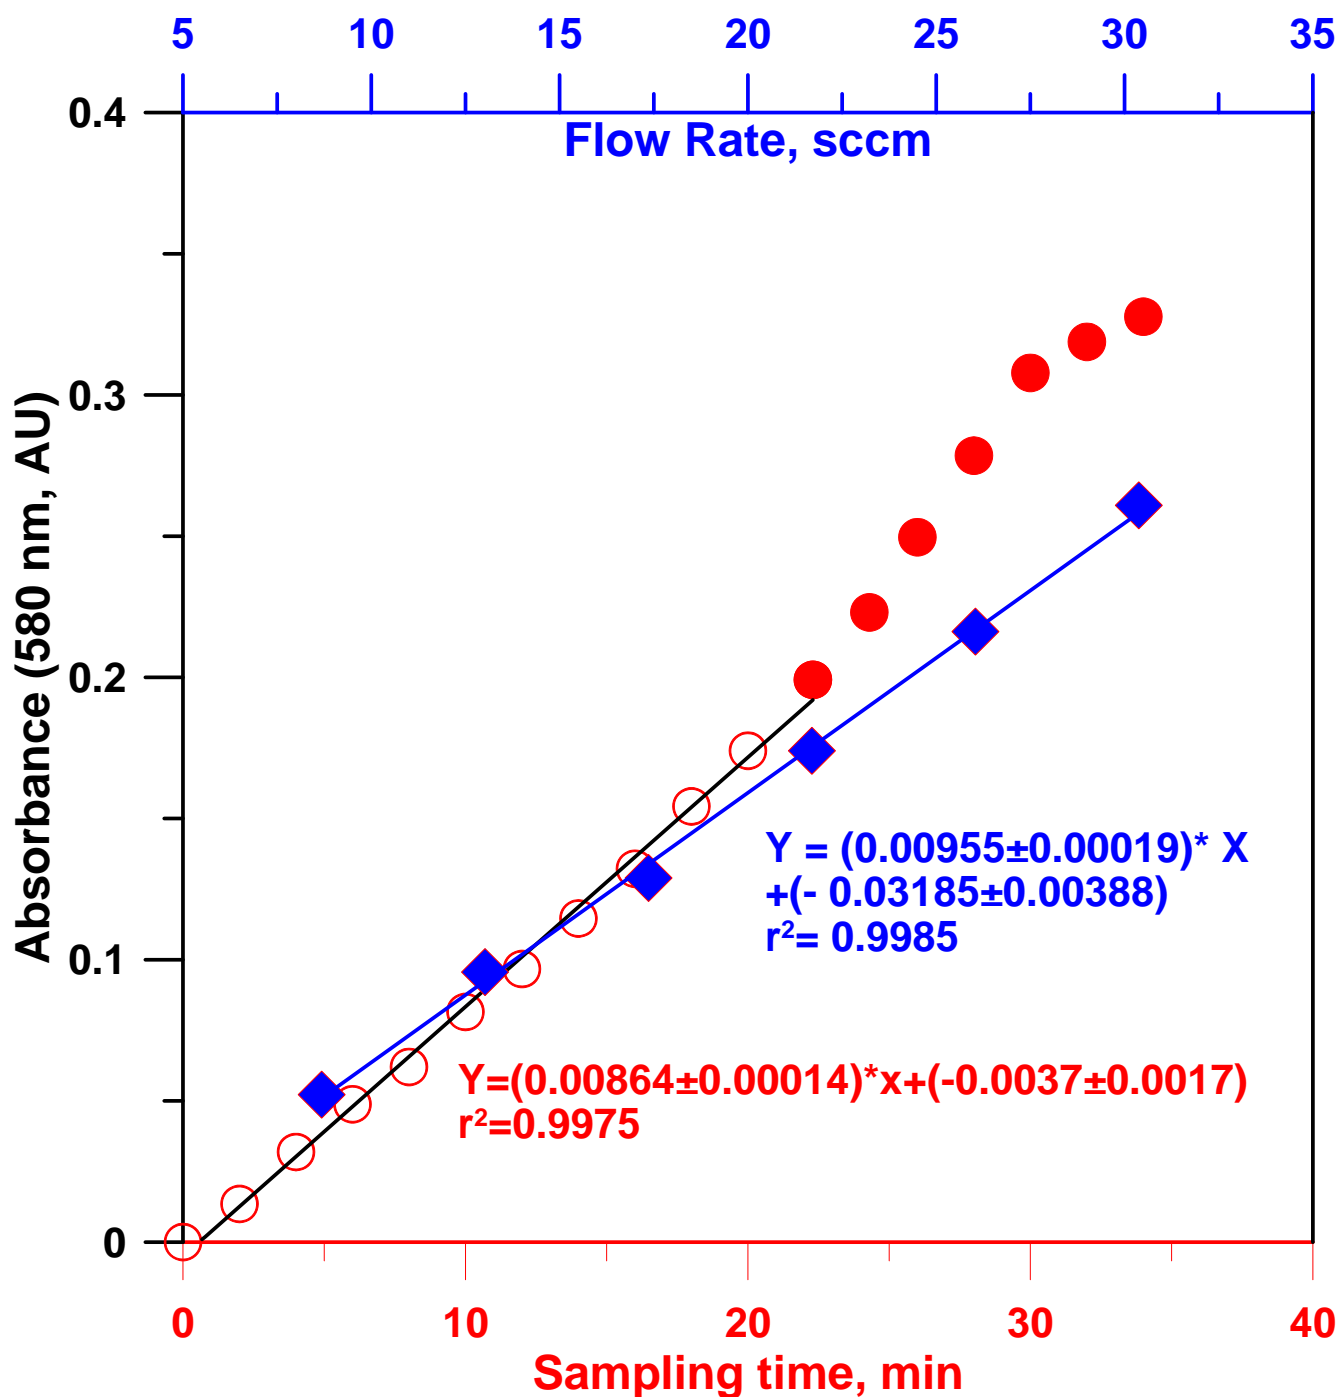

**Figure S4.** Red Curve: Bottom Abscissa: Absorbance change at 580 nm as a function of sampling time using 50  $\mu\text{M}$  cobinamide in 60 mM NaOH as absorber. Generation solution  $\sim 0.6$  mM total cyanide, 18.8  $^{\circ}\text{C}$ . gas flow rate 21.7 sccm,  $\sim 25$  nmol/min HCN entering absorber. Note that the slope changes after 20 min when dicyanocobinamide begins to be formed. Blue curve: Top Abscissa: Absorbance change at 580 nm as a function of gas flow rate, 20 min sampling time, other conditions same as above.

**Table S1.** Calibration curves at different reaction time

| Reaction time, min | Calibration curve (n=6) | r <sup>2</sup> |
|--------------------|-------------------------|----------------|
| 0                  | Abs=(1.52±0.06)*C (mM)  | 0.9901         |
| 1                  | Abs=(3.39±0.04)*C (mM)  | 0.9994         |
| 2                  | Abs=(3.81±0.04)*C (mM)  | 0.9994         |
| 3                  | Abs=(4.01±0.04)*C (mM)  | 0.9995         |
| 5                  | Abs=(4.16±0.05)*C (mM)  | 0.9993         |
| 10                 | Abs=(4.22±0.08)*C (mM)  | 0.9982         |
| 15                 | Abs=(4.19±0.10)*C (mM)  | 0.9973         |
| 20                 | Abs=(4.20±0.12)*C (mM)  | 0.9960         |

There was no significant improvement in the linear r<sup>2</sup> values when an intercept was allowed.

Regression equations forced through zero are therefore given.
